# Supplementary material for: Logistic growth of a surface contamination network and its role in disease spread
Source: PubMed Central journal article supplement (PMC5665872; doi:10.1038/s41598-017-13840-z), 2017-11-01
Supplement: 41598_2017_13840_MOESM1_ESM.pdf [file 41598_2017_13840_MOESM1_ESM.pdf]

# SUPPLEMENTAL INFORMATION

## Logistic growth of a surface contamination network and its role in disease spread

### 1. SUPPLEMENTARY METHODS

#### 1.1 The spatial distribution of passengers in the two outbreaks

The detailed environmental setting and spatial distribution of passengers in the two outbreaks are shown in [Figure S1](#).

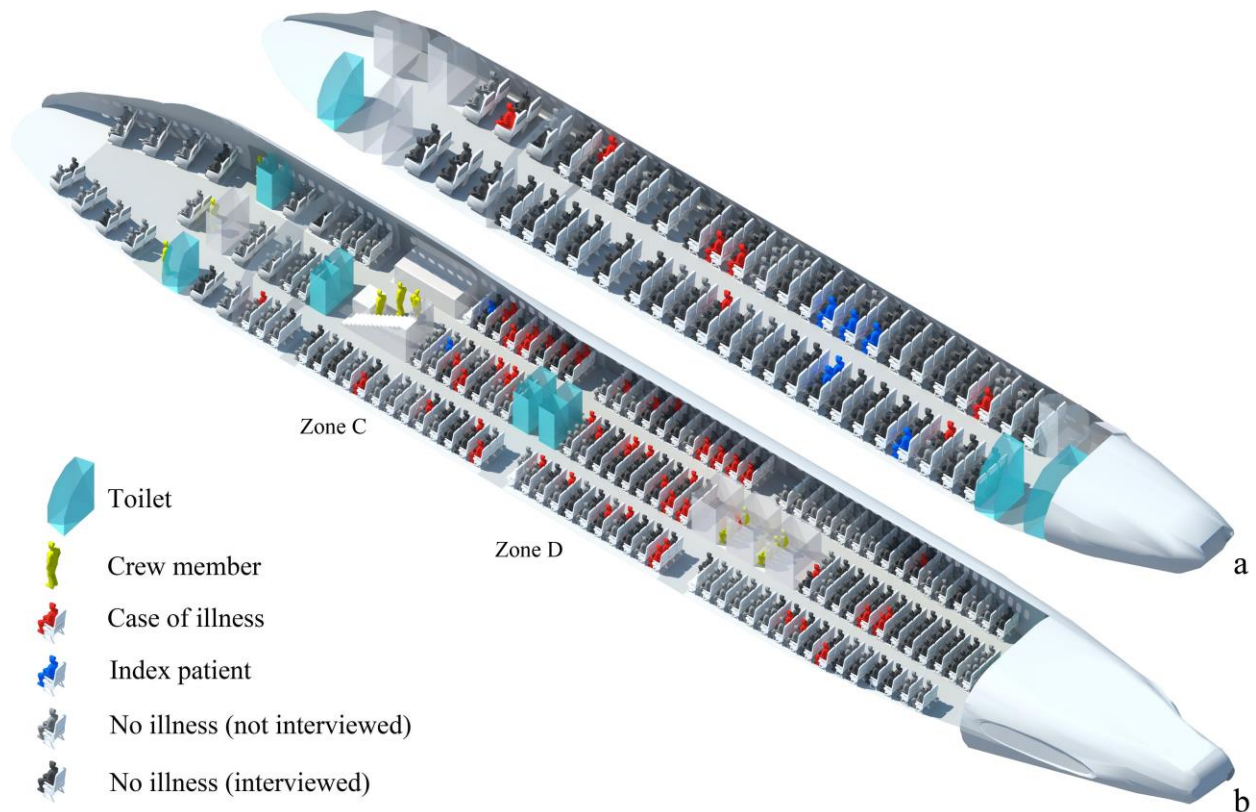

**Figure S1** The reported spatial distribution of gastrointestinal cases on two flights, (a) Norovirus GII 737<sup>1</sup>, (b) Norovirus GI 747<sup>2</sup>. Zones C and D in the 747 cabin are highlighted.

#### 1.2 Theoretical study of the growth of contaminated surfaces

We proposed a mathematical approach using ordinary differential equations (ODEs) to analyse the relationship between the growth of the number of surfaces contaminated with live pathogens, an individual's surface touching behaviour, and hand and surface hygiene. We built the model in an enclosed environment based on the following assumptions:

- 24
- 25 • The total number of surfaces  $N_s$  is constant.  $N_s = N_{sd}(t) + N_{sc}(t)$ , where  $N_{sd}(t)$  and
- 26  $N_{sc}(t)$  are the number of dirty (contaminated with live pathogens) and clean surfaces at
- 27 time  $t$  respectively.
- 28 • The total population size  $N_p$  is constant.  $N_p = N_{pd}(t) + N_{pc}(t)$ , where  $N_{pd}(t)$  and
- 29  $N_{pc}(t)$  are the numbers of individuals with dirty (contaminated with live pathogens) and
- 30 clean hands at time  $t$  respectively.
- 31 • Populations touch portions of the fomite homogeneously.
- 32 • Cleaning of surfaces and hands occurs uniformly. For example, if the surface cleaning
- 33 rate is two times per hour, all surfaces would be disinfected every half hour, and the
- 34 disinfection efficacy would be 100%.
- 35

36 Some parameters used in the model are defined in [Table S1](#).

37

38 **Table S1** Parameters in the equations.

| Parameter | Description                                                                                                                           |
|-----------|---------------------------------------------------------------------------------------------------------------------------------------|
| $c_s$     | Surface contact rate, the total number of surface-to-hand contacts per unit of time divided by the number of surfaces.                |
| $c_p$     | Hand contact rate, the total number of surface-to-hand contacts per unit of time divided by the number of people. $c_s N_s = c_p N_p$ |
| $d_p$     | Pathogen cleaning rate of individual hands.                                                                                           |
| $d_s$     | Pathogen cleaning rate of surfaces.                                                                                                   |

39

40 In each time unit,  $c_p \times N_p$  hand-to-surface touching behaviours occur, and only a clean hand

41 touching a dirty surface can lead to an increased number of dirty hands. Based on the assumption

42 that populations touch fomites homogeneously,  $c_p \times N_p \times \frac{N_{sd}(t)}{N_s} \times \frac{N_{pc}(t)}{N_p} = c_p N_{pc}(t) \times \frac{N_{sd}(t)}{N_s}$

43 clean hands-to-dirty surfaces touching behaviours occur in each time unit. Thus,

$$44 \frac{dN_{pd}(t)}{dt} = c_p N_{pc}(t) \frac{N_{sd}(t)}{N_s} - d_p N_{pd}(t) \quad (1)$$

45 Similarly,

$$46 \frac{dN_{sd}(t)}{dt} = c_s N_{sc}(t) \frac{N_{pd}(t)}{N_p} - d_s N_{sd}(t) \quad (2)$$

47

48 There is no analytic solution for [Equations \(1\) and \(2\)](#), so the dynamic properties and

49 numerical solutions for different situations are obtained as follows:

50

51 The dynamic properties of [Equations \(1\) and \(2\)](#) indicate that

52

$$53 \text{ when } c_p c_s - d_p d_s \geq 0, N_{pd}(t) \rightarrow \frac{N_p(c_p c_s - d_p d_s)}{c_p(c_s + d_s)}, N_{sd}(t) \rightarrow \frac{N_s(c_p c_s - d_p d_s)}{c_s(c_p + d_p)}, \text{ as } t \rightarrow \infty,$$

$$54 \text{ and } c_p c_s - d_p d_s < 0, N_{pd}(t) \rightarrow 0, N_{sd}(t) \rightarrow 0, \text{ as } t \rightarrow \infty.$$

55

56 Suppose in an enclosed environment there are 100 non-porous surfaces and 100 individuals, and

57 on average every individual touches one surface every 30 minutes, then  $c_p = 0.033/\text{min}$ .  $c_s =$

58  $(100 \times 2)/(100 \times 60) = 0.033/\text{min}$ .

59

60 Take the influenza virus as an example. The influenza virus can survive for 24–48 hours on hard  
61 and non-porous surfaces<sup>3</sup>. On hands (skin), after being incubated on the skin for an hour, only  
62 1% of the parainfluenza virus survives<sup>4</sup>. If there is no hand hygiene or disinfection of surfaces,  
63 taking the average value for hard, non-porous surfaces,  $d_s = 1/36 \text{ hr} = 4.6 \times 10^{-4}/\text{min}$ ; for  
64 hands  $d_p = 1.7 \times 10^{-2}/\text{min}$ .

65

66 When surface cleaning frequency is low, such as once every 6 hours, and all individuals wash  
67 and clean their hands once every 2 hours, then  $d_s = (1/(6 \times 60) + 4.6 \times 10^{-4})/\text{min} =$   
68  $0.0032/\text{min}$  and  $d_p = (1/(2 \times 60) + 1.7 \times 10^{-2})/\text{min} = 0.025/\text{min}$ . Then  $c_p c_s - d_p d_s > 0$ .  
69 The numerical solutions of Equation (1) and (2) with the initial condition  $y_{sd}(0) = 0$ ,  $y_{pd}(0) =$   
70 1 are shown in Figure 3e.

71

72 When surface cleaning frequency is high, i.e., once every half an hour, and all individuals clean  
73 their hands every 30 minutes, then  $d_s = (1/30 + 4.6 \times 10^{-4})/\text{min} = 0.034/\text{min}$ ,  $d_p =$   
74  $(1/30 + 1.7 \times 10^{-2})/\text{min} = 0.050/\text{min}$ . Then  $c_p c_s - d_p d_s < 0$ . The numerical solutions of  
75 Equations (20) and (21) with the initial condition  $y_{sd}(0) = 10$ ,  $y_{pd}(0) = 0$  are shown in Figure  
76 S2.

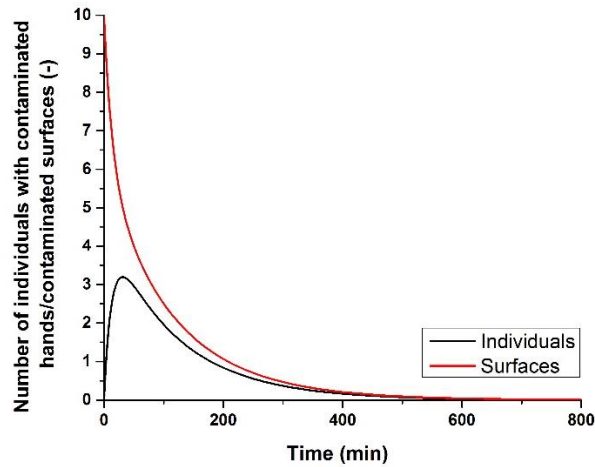

77

78 **Figure S2.** Numerical solutions for a high surface/hand hygiene rate.

79

### 80 1.3 Bench-top experiment study of surface contamination networks

81

82 To study growth in the number of contaminated surfaces, we also built a bench-top experiment  
83 using a mock-up of an aircraft cabin, as shown in Figure 6 in the main text. As in our computer  
84 simulations, four kinds of surface were considered, namely 120 seatbacks, 160 armrests, 120 tray  
85 tables and 2 toilets (refined into outside and inside door handles, toilet seat covers, toilet buttons,  
86 taps, sanitisers and other surfaces). The sketch of the aircraft cabin was printed on a piece of  
87 waterproof paper (0.9 m by 3 m), and the height of the experiment chamber was 1 m. The  
88 surface materials were simply divided into two types according to differences in porosity, with  
89 Dacron applied on the seatbacks and a modified propylene polymer on the others. To better

90 simulate the touching process, the dimensions of surfaces in the experiment were reduced from  
91 those in the real air cabin by a proportion of 5.17, which is the ratio of palm size to finger size.

92  
93 Participants were instructed to touch the surfaces (chips) in a specific sequence, and/or use a  
94 specific type of grasp (light touch for the results shown here, firm touch, sliding, etc.). The  
95 computer-generated sequence follows the same rules as in the computational simulations.  
96 Participants' fingerstalls stand for people in the aircraft cabin, i.e., passengers or air crew  
97 members. Either participants' fingers were smeared with fluorescent particles, or fluorescent  
98 particles were applied to specific chips, known only to the researchers. To reduce costs, one  
99 human subject could play up to ten roles if each finger represents one person. This simple design  
100 allowed us to complete one test in 5 to 10 hours. Qualitative observation of fluorescence using  
101 UV lamps indicated how many chips/fingers were contaminated at different times, showing how  
102 the fluorescent particles were transferred from the initial contaminated surface over eight (or  
103 some other number of) consecutive surfaces.

104  
105  
106 We made an assumption in the experiments that all surfaces were clean before the flight, which  
107 might not be true in reality. We considered that there were two index patients during the flight,  
108 seated in 8B and 9E. [Figure S3a](#) shows the contamination conditions of surfaces in the  
109 experiment at Round 15. The white dots show areas contaminated with fluorescent particles;  
110 brighter dots indicate a larger number of fluorescent particles. In the experiment, we took a  
111 photograph after a passenger used the toilet and went back to his or her seat (the entire process  
112 was considered to be one round).

113  
114 To make the contamination of each surface more discernible, MATLAB 2013b was used to  
115 exclude the influence of reflected light and preserve the affected parts of the photo, namely the  
116 light emitted by fluorescent particles. The contamination conditions in Rounds 8, 15, 22, 29, 36,  
117 43 are shown in [Figure S3b–g](#).

118

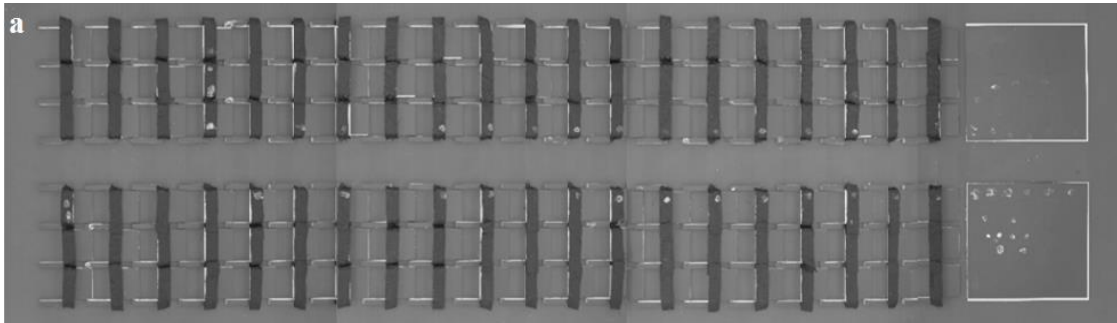

119

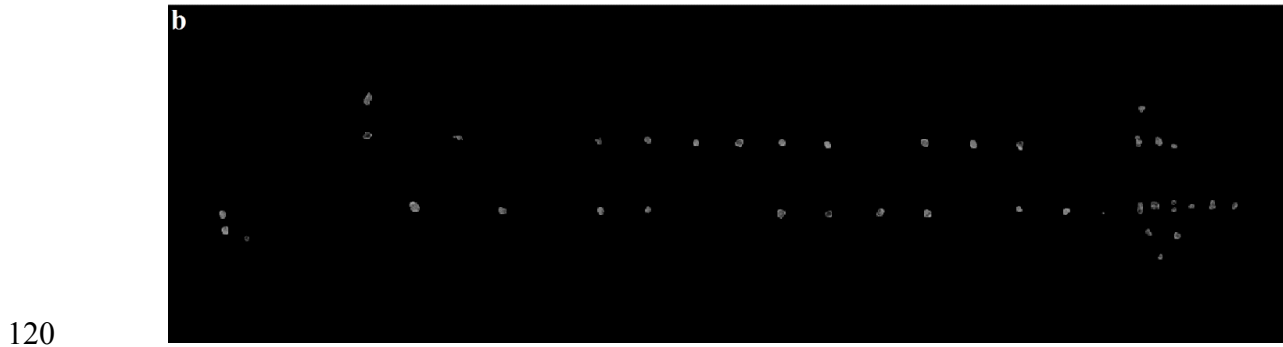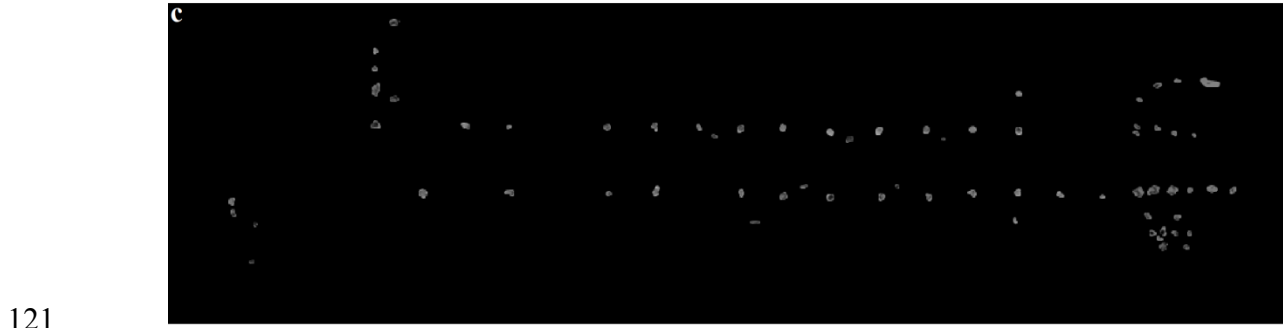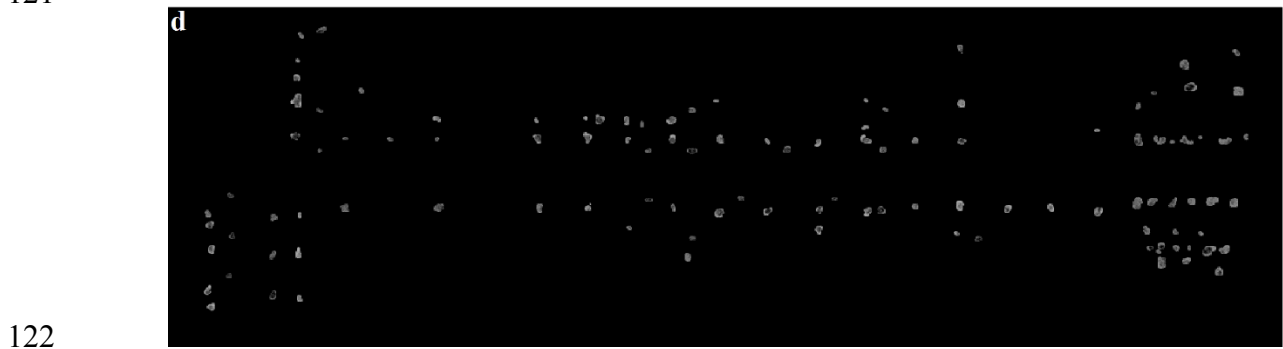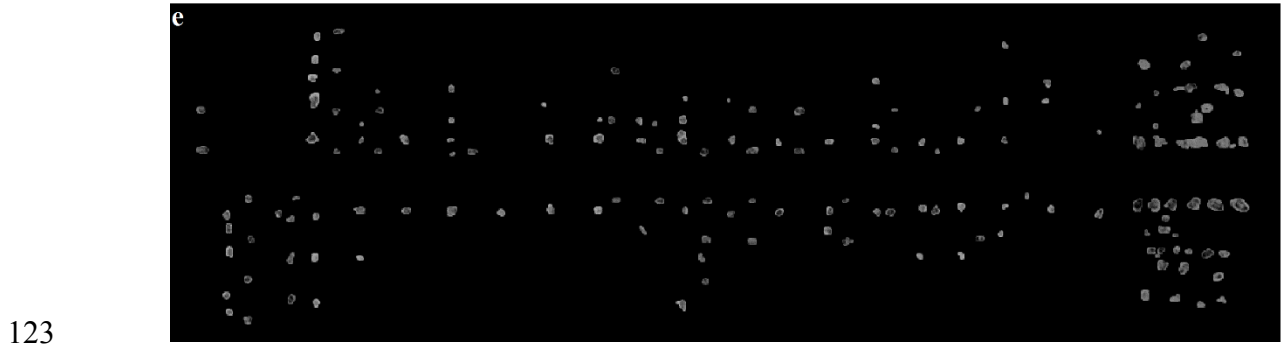

124

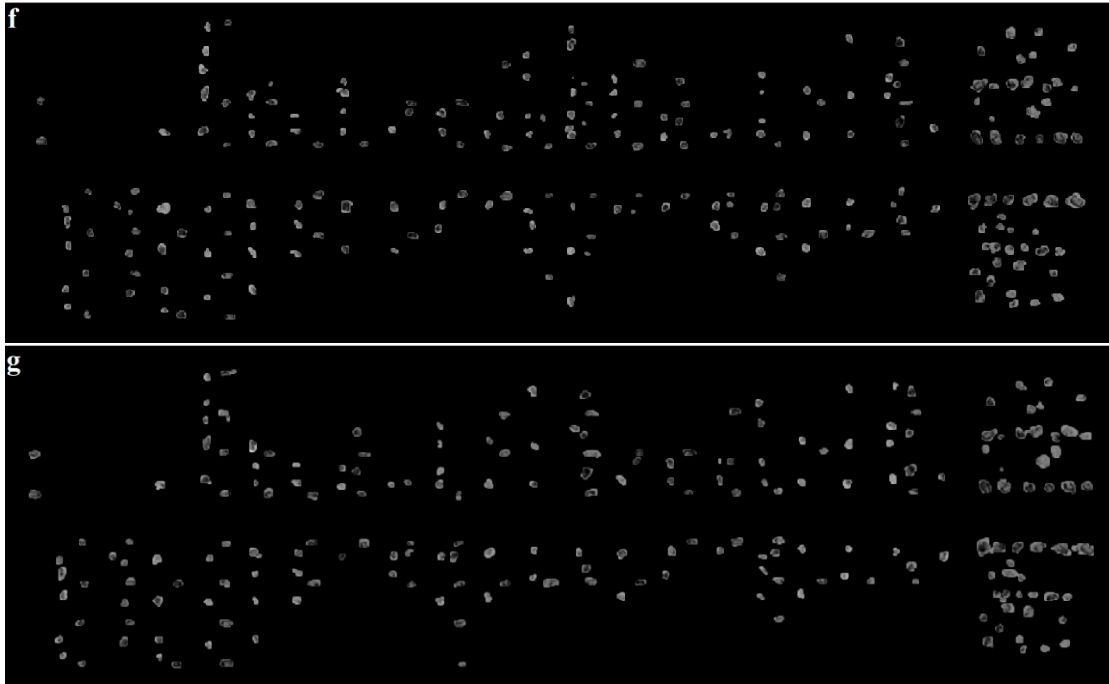

125

126

127 **Figure S3.** a) Contamination conditions of surfaces in one experiment, Round 15. Photos  
128 processed from different rounds: b) Round 8, c) Round 15, d) Round 22, e) Round 29, f) Round  
129 36, g) Round 43.

130

131 [Figure 3f](#) in the main text shows the relationship between time length (represented by the number  
132 of rounds) and the number of contaminated seatback surfaces along the aisle. The number of  
133 contaminated seatback surfaces along the aisle first begins to increase quickly with time, and  
134 then slows. Therefore, a logistic curve was used to fit the data. The R-square and chi-square  
135 values of the logistic regression are 0.906 and 14.10 respectively, which means that the logistic  
136 curve is a good fit for the data.

137

#### 138 **1.4 Modelling the fomite route**

139

140 We constructed a surface contamination network with the following assumptions. Individual  
141 differences in surface touching behaviour were ignored. For each type of surface, the touching  
142 behaviour for each individual was assumed to be the same and the interval between two  
143 subsequent touching behaviours was equal. A constant virus transfer rate was assumed for each  
144 type of surface. The surface transfer rates were obtained from existing studies of porous, non-  
145 porous and wet surfaces. We ignored the influence of touch pressure and other factors on transfer  
146 rate.

147

##### 148 *Constructing the surface contamination network*

149

150 We built the surface contamination network in an air cabin environment with detailed flight  
151 information in Table S2.

152

153 **Table S2** Flight information parameters.

| Parameter | Description                                                      |
|-----------|------------------------------------------------------------------|
| $T$       | Flight duration                                                  |
| $T_{ac}$  | Duration after the cruise phase and before the end of the flight |
| $N_{pe}$  | Number of passengers in the flight                               |
| $N_{ce}$  | Number of crew member in the flight                              |
| $N_{ie}$  | Number of infectious cases in the flight                         |

155

156 During the taxi-out and climb phases of a flight, there is no movement of passengers, so surface  
 157 virus accumulations are due to the deposition of the airborne viruses alone. There is currently a  
 158 lack of data on surface touching behaviour. We considered five commonly observed surface  
 159 touching behaviours during the cruise phase: toilet use, touching the aisle seat backrest surfaces  
 160 on the way to the toilets and back, touching the armrest surface, touching the front backrest  
 161 surface and touching the tray table surfaces. And the frequency of these five surface touching  
 162 behaviors are listed in Table S3.

163

164 **Table S3** Frequency of the modelled five surface touching behaviors during air travel.

165

| Parameter    | Description                                                                                                  | Value | Source  |
|--------------|--------------------------------------------------------------------------------------------------------------|-------|---------|
| $f_{st}$     | Toilet use frequency for susceptible individual [1/hr]                                                       | 1/6   | Assumed |
| $f_{it}$     | Toilet use frequency for infector [1/hr]                                                                     | 1/3   | Assumed |
| $P_{tasb}$   | Probability that an individual will touch certain aisle seatback surfaces on the way to toilets and back [-] | 1/6   | Assumed |
| $f_h^{i,as}$ | Frequency for individual $i$ to touch the armrest surfaces [1/hr]                                            | 5     | Assumed |
| $f_h^{i,sb}$ | Frequency for individual $i$ to touch the immediate front seatback surfaces [1/hr]                           | 3     | Assumed |
| $f_h^{i,tt}$ | Frequency for individual $i$ to touch the tray table surfaces [1/hr]                                         | 4     | Assumed |

166

167 To specify behaviour patterns, we divided the cruise phase into several time intervals. In each  
 168 time interval, the above surface touching behaviours of each individual can occur once at most.  
 169 We placed all behaviours at different time intervals based on certain mechanisms. Then similar  
 170 to the study by King *et al*<sup>5</sup>, a Markov Chain was built to calculate the exchange of viruses  
 171 between surfaces and hands at each time step, and also the fomite route exposure. The smaller  
 172 the time interval, the closer the solution will be to the actual situation, but a finer division also  
 173 means more calculations. The duration between two sequential surface touching for five kinds of

174 touching behaviours is listed in Table S4. Generally, due to the large number of passengers, the  
 175 duration between two sequential toilet visit  $\Delta T_{te}$  is always much smaller than the duration  
 176 between two sequential seatback surface touching, armrest surface touching, tray table surface  
 177 touching, and mucous membranes touching, so we divided the cruise phase by  $\Delta T_{te}/2$ , giving a  
 178 total of  $\frac{2T_c}{\Delta T_{te}}$  time intervals.

179  
 180 **Table S4** Duration between two sequential same surface touching.  
 181

| Surface touching behaviour  | Duration between two sequential contacts                                                                                                                                       |
|-----------------------------|--------------------------------------------------------------------------------------------------------------------------------------------------------------------------------|
| Toilet visits               | $\Delta T_{te} = T_c / \left( \lfloor N_{ie} \times (T - T_{ac}) \times f_{it} \rfloor + \lfloor (N_{pe} + N_{ce} - N_{ie}) \times (T - T_{ac}) \times f_{st} \rfloor \right)$ |
| Seatback surface touching   | $1 / f_h^{i, sb}$                                                                                                                                                              |
| Armrest surface touching    | $f_h^{i, as}$                                                                                                                                                                  |
| Tray table surface touching | $1 / f_h^{i, tt}$                                                                                                                                                              |
| Mucous membranes touching   | $1 / f_h^{i, m}$                                                                                                                                                               |

182  
 183 where  $N_{ite}$  and  $N_{ste}$  are the total number of toilet visits in Economy class for the infectors and  
 184 susceptible individuals respectively,  $\lfloor \cdot \rfloor$  is the floor function. We assume the distribution of the  
 185 total  $N_{ite} + N_{ste}$  toilet visits in the entire cruise phase of the flight is uniform.

186  
 187 Next, we define when each type of behaviour occurs in the cruise phase.  
 188

189 First, the total number of toilet visits ( $\lfloor N_{ie} \times (T - T_{ac}) \times f_{it} \rfloor + \lfloor (N_{pe} + N_{ce} - N_{ie}) \times (T -$   
 190  $T_{ac}) \times f_{st} \rfloor$ ) are uniformly distributed in the odd time steps during the cruise phase, and it was  
 191 assumed that if a passenger uses the toilet at time step  $2k - 1$ , he or she will exit the toilet at  
 192 time step  $2k$  and return to his or her seat.

193  
 194 Second, we specified the aisle seatback surfaces that passengers would touch on the way to the  
 195 toilet and back. We assumed the probability that a passenger would touch one aisle seat back  
 196 surface in this situation is  $P_{tasb}$ , and there are  $s_j$  aisle seat back surfaces on the way to the toilet  
 197 ( $s_j$  is determined by the passenger's seat number). Suppose the passenger sits in the  $j$ th row in  
 198 Economy class. If using a toilet in the front,  $s_j = 2j$ ; if using a toilet in the rear,  $s_j = 2(N_{sre} - j)$ .  
 199 For each passenger who used the toilet, a probability from 0 to 1 was randomly assigned for all  
 200  $s_j$  aisle seatback surfaces. If the probability for one aisle seatback surface was smaller than  $P_{tasb}$ ,  
 201 we assumed that the passenger would touch this aisle seatback surface on the way to the toilet,  
 202 otherwise he or she would not touch it. We similarly specified the aisle seatback surface that this  
 203 passenger would touch on the way back from the toilet to his or her seat.

204  
 205 Third, we specified other four contact behaviours for each passenger: mucous membranes, front  
 206 seatback surfaces, armrest surfaces and tray table surfaces touching. Take the mucous  
 207 membranes touching as an example. The first time for individual  $i$  is randomly chosen, and then



208 after every  $1/f_h^{i,m}$  time, the individual  $i$  would touch the mucous membranes once. The  
 209 arrangements of front seatback surfaces, armrest surfaces and tray table surfaces touching are  
 210 similar.

211  
 212 A surface contact network can be represented by the matrix  $Ps = (ps(k))_{N_s \times N_p}$ , which  
 213 describes the probability of surface touching behaviours at time step  $k$ .  $N_p$  is the total number of  
 214 individuals, and  $N_s$  is the total number of environmental surfaces. If at time step  $k$ , individual  $i$   
 215 touched surface  $j$ ,  $ps_{j,i}(k)=1$ , otherwise,  $ps_{j,i}(k) = 0$ . The matrix  $Ps$  is the incidence matrix of  
 216 the surface contamination network.

217  
 218 We built two matrices,  $C_s(k)$  with a dimension of  $(N_s \times \frac{2T_c}{\Delta T_{te}})$  and  $C_h(k)$  with a dimension  
 219 of  $(N_{pe} + N_{ce}) \times \frac{2T_c}{\Delta T_{te}}$ , where  $C_{s_j}(k)$  represents the virus concentration on the  $j$ th surface at the  
 220 end of time interval  $k$ ,  $N_s$  is the total number of surfaces under consideration.  $C_{h_i}(k)$  is the virus  
 221 concentration on the individual  $i$ 's hand at the end of time interval  $k$ . The diagram for the fomite  
 222 route model is shown in [Figure S4](#).

223

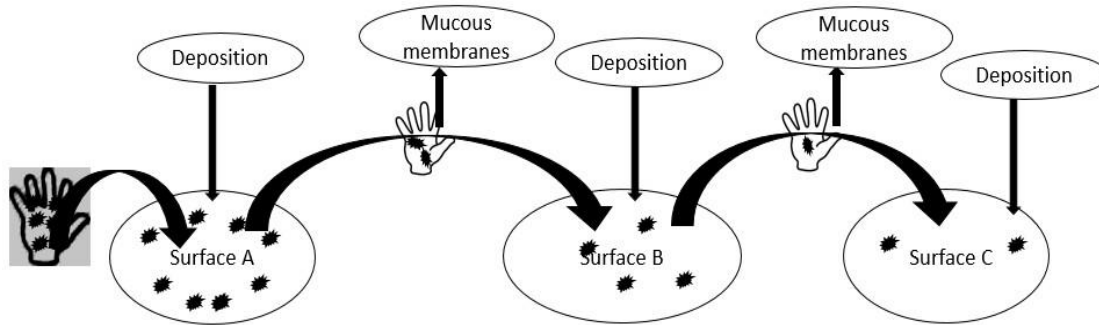

224

225

226 **Figure S4.** The fomite route model.

227

228

### 229 **Initial virus concentration on surfaces**

230 After vomiting, the mass of vomitus per hand is estimated to be  $10^{-3}$  g<sup>Error! Reference source not found.</sup>,  
 231 the virus concentration in faeces from a norovirus patient is assumed to be  $L(r_0, 0)$  (genome/g),  
 232 and the initial virus concentration on a patient's hand is  $10^{-3}L(r_0, 0)/A_h$  (genome/m<sup>2</sup>). If the  
 233 patient vomited in the toilet, the concentration of faeces on the toilet surface is estimated to be  
 234  $1\text{g/cm}^2$  <sup>Error! Reference source not found.</sup>, if the toilet were cleaned after the patient vomited in it.  
 235 Assuming the cleaning efficiency is  $\eta_c$ , then the initial virus concentration is  $(1-\eta_c)L(r_0, 0)$   
 236 (genome/m<sup>2</sup>).

237

### 238 **Parameter selection**

239 A large number of parameters are involved in our model. The chosen parameter values are listed  
 240 in [Table S5](#) along with the references. Parameter sensitivity studies were also carried out.

241

242 **Table S5** Parameter values for the baseline case.  
 243

| Parameter        |                                                                               | Description                                                           | Value             | Source                                                            |
|------------------|-------------------------------------------------------------------------------|-----------------------------------------------------------------------|-------------------|-------------------------------------------------------------------|
| $b_h$            |                                                                               | Norovirus first-order inactivation rate on hands [1/hr]               | 0.23              | Estimated from Liu <i>et al.</i> <sup>6</sup>                     |
| $b_{s_j}$        | $b_p$                                                                         | Norovirus first-order inactivation rate on porous surfaces [1/hr]     | 0.1               | Assumed                                                           |
|                  | $b_{np}$                                                                      | Norovirus first-order inactivation rate on non-porous surfaces [1/hr] | 0.095             | Estimated from Cannon <i>et al.</i> <sup>7</sup>                  |
|                  | $b_{wp}$                                                                      | Norovirus first-order inactivation rate on wet surfaces [1/hr]        | 0.027             | Estimated from Cannon <i>et al.</i> <sup>7</sup>                  |
| $\tau_{s_j h_i}$ | $\tau_{ph}$                                                                   | Transfer rate from porous surfaces to hands [-]                       | 0.03              | Sattar <i>et al.</i> <sup>8</sup>                                 |
|                  | $\tau_{nph}$                                                                  | Transfer rate from non-porous surfaces to hands [-]                   | 0.07              | Mokhtari and Jaykus <sup>Error! Reference source not found.</sup> |
|                  | $\tau_{wh}$                                                                   | Transfer rate from wet surfaces to hands [-]                          | 0.2               | Mokhtari and Jaykus <sup>Error! Reference source not found.</sup> |
| $\tau_{h_i s_j}$ | $\tau_{hp}$                                                                   | Transfer rate from hands to porous surfaces [-]                       | 0.8               | Estimated from Mackintosh and Hoffman <sup>9</sup>                |
|                  | $\tau_{hnp}$                                                                  | Transfer rate from hands to non-porous surfaces [-]                   | 0.12              | Estimated from Lopez <i>et al.</i> <sup>10</sup>                  |
|                  | $\tau_{hw}$                                                                   | Transfer rate from hands to wet surfaces [-]                          | 0.14              | Mokhtari and Jaykus <sup>Error! Reference source not found.</sup> |
| $\tau_{hm}$      |                                                                               | Transfer rate from hands to mucous membranes [-]                      | 0.35              | Estimated from Rusin <i>et al.</i> <sup>11</sup>                  |
| $A_{hm}$         |                                                                               | Hand contact area when touching mucous membranes [m <sup>2</sup> ]    | 0.0002            | Nicas and Sun <sup>12</sup>                                       |
| $A_h$            |                                                                               | Contact area of hands and environmental surfaces [m <sup>2</sup> ]    | 0.013             | Estimated                                                         |
| $f_h^{i,m}$      |                                                                               | Frequency for individual $i$ to touch his/her mucous membranes [1/hr] | 5                 | Hendley <i>et al.</i> <sup>13</sup>                               |
| $L(r_0, t)$      | Initial virus concentration in faeces from norovirus patient [cDNA genomes/g] | GI                                                                    | $8.4 \times 10^5$ | Chan <i>et al.</i> <sup>14</sup>                                  |
|                  |                                                                               | GII                                                                   | $3 \times 10^8$   |                                                                   |
| $\eta_c$         |                                                                               | Toilet cleaning efficiency [-]                                        | 99%               | Assumed                                                           |

244  
 245 **1.5 Modelling the airborne route**

246 Faecal-oral spread is the primary mode of norovirus transmission<sup>15</sup>. However, it has been  
 247 suggested that vomiting can produce aerosol droplets containing viral particles, which are  
 248 inhaled by exposed susceptible individuals, deposited in the upper respiratory tract and then  
 249 swallowed along with the respiratory mucus<sup>16</sup>. Airborne norovirus was detected in air samples  
 250 from one norovirus outbreak in a healthcare facility<sup>17</sup>. A study of a hotel norovirus outbreak in  
 251 which no food source was implicated found an inverse relationship between infection risk and  
 252 the distance from the person who vomited<sup>18</sup>. These studies demonstrate the possibility of  
 253 norovirus transmission via the airborne route. The potential for its fomite transmission is also  
 254 supported by the widespread environmental contamination observed in a prolonged norovirus  
 255 outbreak in a hotel<sup>19</sup>. Two previous investigations isolated norovirus RNA from environmental  
 256 surfaces and suggested that environmental contamination is likely to have played a major role in  
 257 prolonging the outbreaks<sup>20</sup>. In this study, we did not consider person-to-person contact because it  
 258 is rare during a flight, especially between strangers; rather, we modelled the airborne route, as in  
 259 the 747 GI outbreak, when the index patient vomited on the aisle.

260

### 261 ***Definition of the airborne transmission route***

262 The airborne route refers to direct inhalation of an infectious agent through small droplet nuclei  
 263 (the residue of large droplets containing microorganisms that have evaporated to a respirable  
 264 aerodynamic radius of less than 5  $\mu\text{m}$ )<sup>21</sup>. We separated airborne infection into short-range  
 265 airborne infection (within 2 m of the index patient(s)) and long-range airborne infection (sharing  
 266 the same indoor environment). In simulating the long-range airborne transmission, the cabin air  
 267 flow is assumed to be fully mixed and the steady-state concentration of infectious agents can be  
 268 quickly reached when the source release is constant.

269

270 In the 747 GI outbreak, the index patient vomited in the aisle. Microbiological data show that  
 271 projectile vomiting associated with norovirus infection may distribute up to  $3 \times 10^7$  virus  
 272 particles as an aerosol with a total volume about 30 ml<sup>22</sup>. It is difficult for large droplets with a  
 273 diameter greater than 10  $\mu\text{m}$  to move as high as 1 m in the vertical direction, meaning they are  
 274 unlikely to be inhaled by susceptible individuals. So for the airborne route of norovirus  
 275 transmission, we considered only droplet nuclei with a diameter of less than 10  $\mu\text{m}$ , which can  
 276 be suspended in the air for a prolonged period.

277

### 278 ***Modelling the airborne route***

279 The exposure dose in the upper respiratory tract of individual  $i$  due to the airborne route is  
 280 denoted as  $D_{au}^i$ , and can be estimated as follows for flight duration  $T$ :

281

$$282 \quad D_{au}^i = \int_0^T \int_0^{r_a} C_i(r, t) p \delta_u(r) t \frac{4}{3} \pi r_0^3 L(r_0, t) dr dt \quad (3)$$

283

284 where  $r_a$  is the largest radius for airborne droplets and  $r_a = 5 \mu\text{m}$  (Nicas and Jones, 2009);  
 285  $C_i(r, t)$  is the concentration of the droplet with diameter  $r$  in the inhaled air of individual  $i$ ;  $p$  is  
 286 the pulmonary ventilation rate and  $p = 0.48 \text{ m}^3/\text{hr}$ <sup>23</sup>;  $r_0$  is the initial radius of the droplet,  $r$  is  
 287 the final radius after complete evaporation, assuming that  $r = r_0/3$  (Liu *et al.*);  $\delta_u(r)$  is the  
 288 deposition rate of droplets with radius  $r$  in the upper respiratory tract (the model from ICRP<sup>24</sup>  
 289 was used in this study);  $L(r_0, t)$  is the concentration of viable viruses (genome copies/ml) in  
 290 droplets with initial radius  $r_0$  at the time  $t$  after being exhaled.  $L(r_0, t)$  changes with the flight  
 291 time  $t$  because of the natural death of viruses in air.

292  
 293  $C_i(r, t)$  varies at different distances from the index patient. Liu *et al.* (unpublished) and Nielsen  
 294 *et al.*<sup>25</sup> compared the airborne droplet concentration at different distances from the patient. A  
 295 concentration ratio  $\varepsilon_c(s_i) = C_i(r, t)/C_{aw}(r, t)$  was defined, where  $C_{aw}(r, t)$  is the droplet nuclei  
 296 concentration in the air away from the index patient,  $s_i$  is the horizontal distance between  
 297 susceptible individual  $i$  and the location of vomiting, then  $C_i(r, t) = \varepsilon_c(s_i)C_{aw}(r, t)$ . The results  
 298 show that  $\varepsilon_c$  decreases almost linearly when the distance increases to between 0.5 and 1 m, and  
 299 at 1 m or more away from the index patient,  $\varepsilon_c$  fluctuates around unity. A simple model is used  
 300 to describe the concentration ratio at distance  $s$  away from the patient, which is given in  
 301 [Equation \(17\)](#).

$$302 \quad \varepsilon_c(s) = \begin{cases} -6s + 7, & s < 1 \\ 1, & s \geq 1 \end{cases} \quad (4)$$

303  
 304 The rapid initial death rate of pathogens atomised into the air has been observed in many  
 305 studies<sup>26,27</sup>. Evaporation of droplets is believed to play an important role<sup>28</sup>. Xie *et al.*<sup>29</sup> found that  
 306 there is a stage of rapid decline in viability as droplets become completely evaporated, at which  
 307 point viability decreases to about 25%, and then slowly declines. For airborne droplets with a  
 308 diameter of less than 10  $\mu$  m, the evaporation time is very short (less than 0.1 second<sup>30</sup>), so in  
 309 this airborne transmission model, it is assumed that all the airborne droplets have been  
 310 completely evaporated before being inhaled by susceptible individuals, and that the viable virus  
 311 concentration is 25% of its initial value.

312  
 313 It is assumed that these droplets are uniformly and rapidly distributed in the air, which is set as  
 314 the initial condition. Then the concentration of the norovirus-containing airborne droplets in the  
 315 aircraft cabin can be calculated according to the following ordinary differential equation:

$$316 \quad V \frac{d(\varepsilon_c(s_i)C_{aw}(r,t)L(r_0,t))}{dt} = -(q + b_a + kr^2)VC_{aw}(r, t)L(r_0, t) + (1 - F_{HEPA})R_{re}qV C_{aw}(r, t)L(r_0, t)$$

$$317 \quad C_{aw}(r, t_0) = 3 \times 10^7 F_c(r_0)/V, \text{ for } r < 5 \mu \text{ m} \quad (5)$$

318  
 319 where  $q$  is the air change rate (ACH) in the aircraft cabin and  $q = 25/\text{hr}$ .<sup>31</sup>;  $b_a$  is the first-order  
 320 inactivation rate of virus in the droplet nuclei in the air. Due to the absence of data about the  
 321 norovirus inactivation rate in air, it is represented by the influenza virus inactivation rate in air,  
 322  $b_a = 0.22/\text{hr}$ <sup>32</sup>. Due to the high air change rate in the aircraft cabin,  $q$  is much larger than  $b_a$ ,  
 323 so the result is not sensitive to small changes in  $b_a$ ;  $kr^2$  is the settling rate of the droplets on a  
 324 surface with radius  $r$ , and  $k = 0.1375/(\text{hr} \cdot \mu \text{ m}^2)$  (estimated from Thatcher *et al.*<sup>33</sup>);  $V$  is the  
 325 volume of the aircraft cabin;  $F_{HEPA}$  is the efficiency of the HEPA filter and  $F_{HEPA} = 99.97\%$ ;  
 326 and  $R_{re}$  is the recirculation rate of the aircraft cabin ventilation system and  $R_{re} = 0.5$ .; and  $t_0$  is  
 327 the time when vomiting occurs.

328  
 329  $F_c(r_0)$  is the size distribution of the droplets from vomiting on the ground. Due to the absence of  
 330 studies on this, the droplet size distribution from coughing in the study by Atkinson and Wein<sup>34</sup>,  
 331 which is given in [Equation \(19\)](#), is used.

$$F_c(r_0) = \begin{cases} \frac{0.71f_1(2r_0)+0.29f_2(2r_0)}{\int_0^{2000}(0.71f_1(2r)+0.29f_2(2r))dr} & \text{for } r_0 \leq 2000 \text{ } \mu\text{ m} \\ 0 & \text{for } r_0 > 2000 \text{ } \mu\text{ m} \end{cases} \quad (6)$$

where  $f_1(x)$  and  $f_2(x)$  are two lognormal distributions with geometric mean and geometric standard deviation  $9.8 \text{ } \mu\text{ m}$  and  $9 \text{ } \mu\text{ m}$ , and  $160 \text{ } \mu\text{ m}$  and  $1.7 \text{ } \mu\text{ m}$ , respectively.

The solution of Equation (18) is

$$C_{aw}(r, t)L(r_0, t) = C_{aw}(r, t)e^{-(q+ba+kr^2-(1-F_{HEPA})qR_{re})(t-t_0)} \quad (7)$$

### **Infection risk assessment**

The dose-response model is used to calculate infection risk. At the exposure dose of  $D$ , both via the airborne route and the fomite route, the infection risk is  $P(= 1 - e^{-\eta D})$ , where  $\eta$  is the dose-response rate. Human susceptibility to the norovirus is determined by secretor status (Se+/-)<sup>35</sup>. The susceptible individuals are divided into two groups: Se+ and Se- subjects. The susceptibility of Se+ and Se- subjects to norovirus varies greatly. The dose-response rates of norovirus GI for Se+ and Se- subjects is 0.14/genome copy and  $9 \times 10^{-4}$ /genome copy, respectively, and for norovirus GII it is 0.2 and  $2.1 \times 10^{-4}$ /genome copy for Se+ and Se- subjects, respectively<sup>35</sup>; it is assumed that 80% of the population are Se+ subjects and the rest are Se- subjects. The infection risk of a susceptible individual  $i$  becomes

$$P_i = 0.8 \times (1 - e^{-\eta_{mSe+} \cdot D^i}) + 0.2 \times (1 - e^{-\eta_{mSe-} \cdot D^i}) \quad (8)$$

## **2. SUPPLEMENTARY RESULTS**

### **2.1 Sensitivity analysis of key parameters in computer simulations**

The main limitations of our model lie in the assumptions about surface touching behaviour during the flight, due to a lack of data. Five commonly observed surface touching behaviours are taken into consideration: touching toilet surfaces (door handles, water faucets, toilet lids, and flushing buttons), touching aisle seat backrest surfaces on the way to the toilets and back, touching front backrest surfaces, touching armrest surfaces, and touching tray table surfaces.

To understand how human behavioural factors may affect the results of our analysis, we take the GII 737 aircraft cabin as an example. We examined the sensitivity of the average infection risk of all susceptible passengers, aisle seat and non-aisle seat passengers via the fomite route with various toilet usage frequencies, probabilities of touching one aisle seatback surface on the way to the toilets and back, frequency of touching front seatback surfaces, armrest surfaces, and tray table surfaces.

- We examined a range of toilet use frequencies for susceptible passengers from 1/12 to 1/2 per hour, as shown in Figure S5a. The baseline value of this parameter was 1/6 per hour.
- We examined a range of probabilities of touching one aisle seatback surface on the way to the toilets and back from 1/12 to 1/2, as shown in Figure S5b. In the baseline simulations, the value of this parameter was 1/6.

- 377 • We examined a range of frequencies of touching the front seatback surfaces for seated  
378 passengers from 1 to 9 per hour, as shown in Figure S5c. In the baseline simulations, the  
379 value of this parameter was 3 per hour.
- 380 • We examined a range of frequencies of touching armrest surfaces for seated passengers from  
381 1 to 9 per hour, as shown in Figure S5d. In the baseline simulations, the value of this  
382 parameter was 5 per hour.
- 383 • We examined a range of frequencies of touching tray table surfaces for seated passengers from 1 to 8  
384 per hour, as shown in Figure S5e. In the baseline simulations, the value of this parameter was 4 per  
385 hour

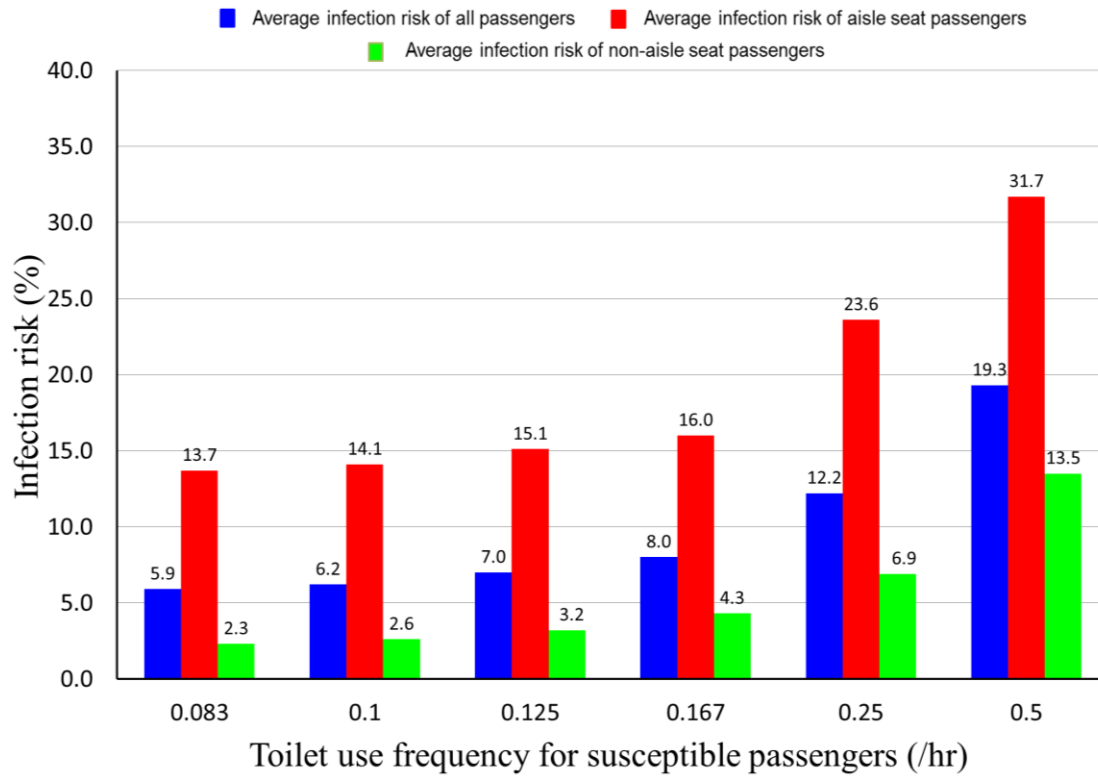

(a)

386  
387  
388

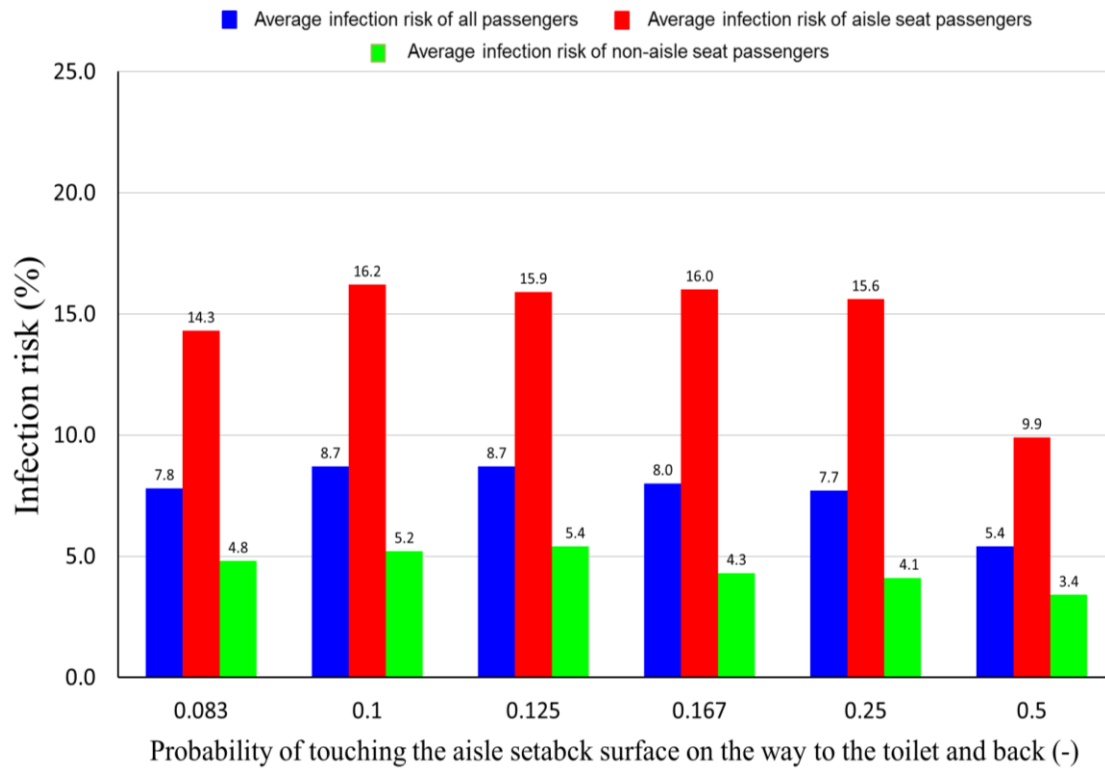

(b)

389  
390  
391  
392

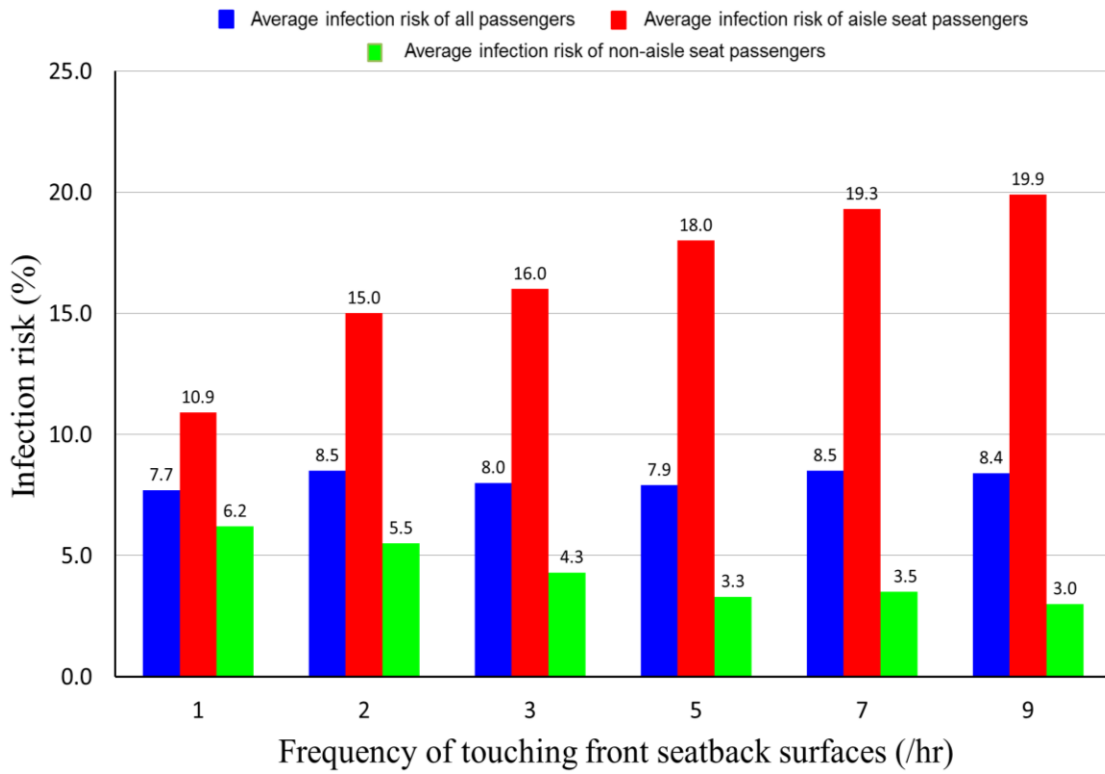

(c)

393  
394  
395

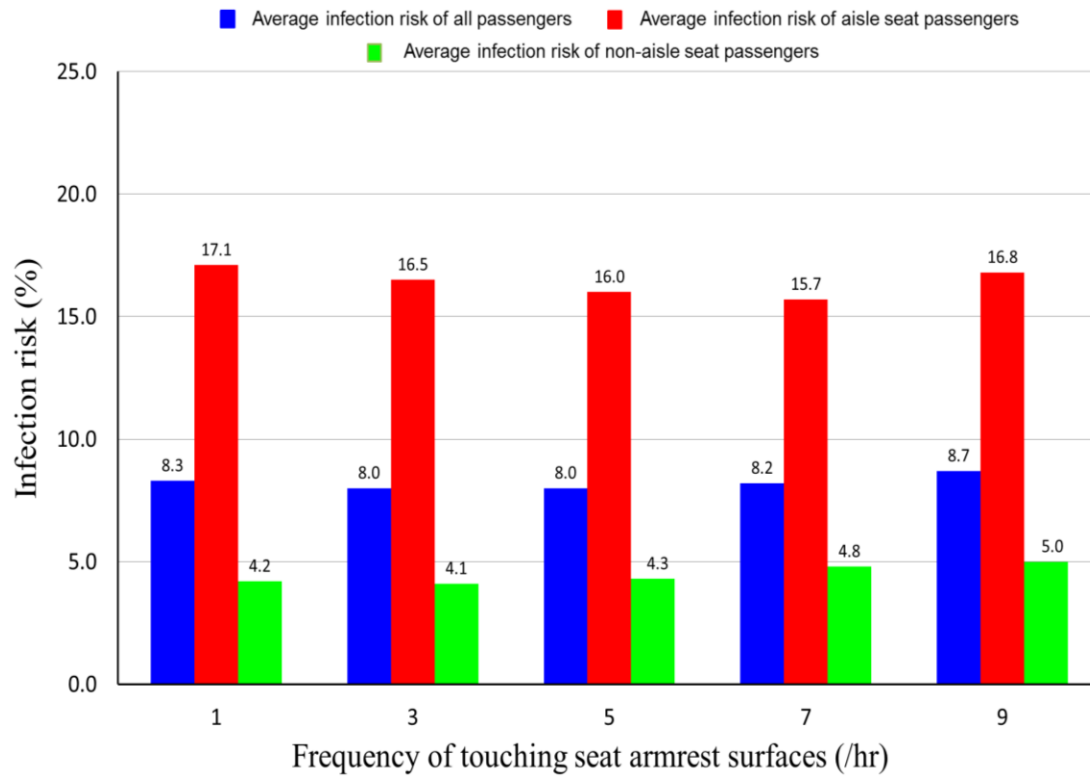

396  
397  
398

(d)

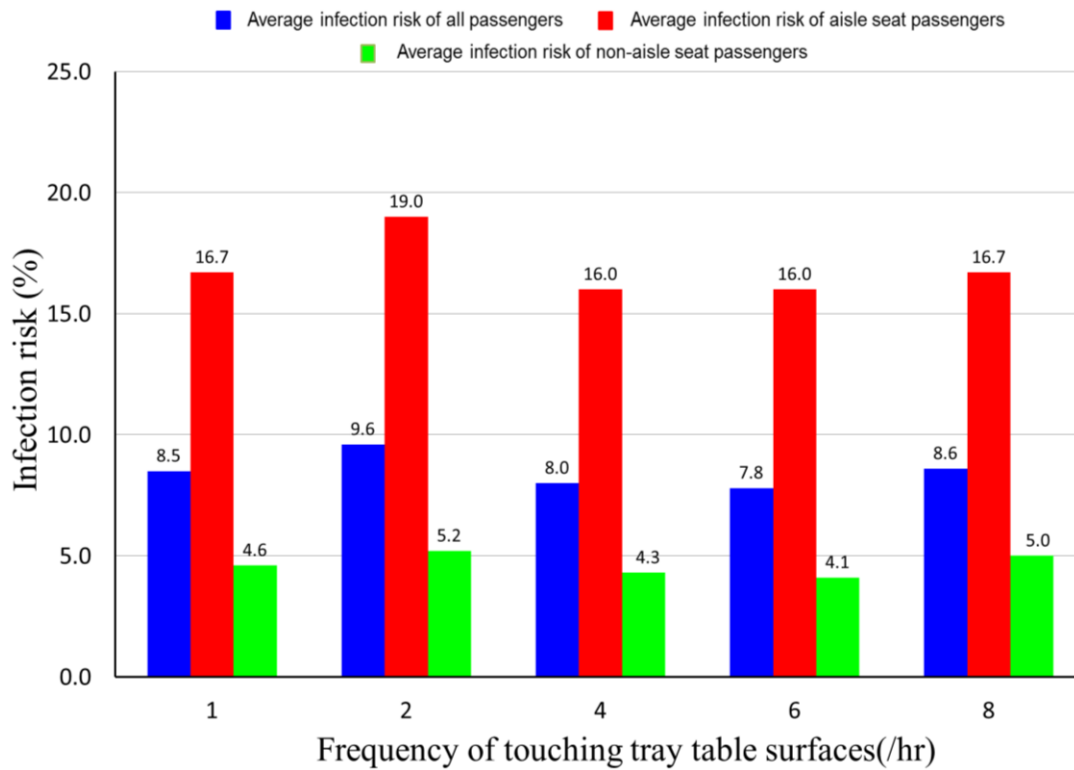

399  
400  
401  
402

(e)

**Figure S5** The average infection risk of all susceptible passengers via the fomite route: (a) as a function of toilet use frequency from 0.083 to 0.5 per hour, where the baseline value of this



403 parameter is 0.167 per hour; (b) as a function of the probability of touching the aisle seatback  
404 surfaces on the way to the toilet and back from 0.083 to 0.5, where the baseline value of this  
405 parameter is 0.167; (c) as a function of the frequency of touching the front seatback surfaces  
406 from 1 to 9 per hour, where the baseline value of this parameter is 3 per hour; (d) as a function of  
407 the frequency of touching armrest surfaces from 1 to 9 per hour, where the baseline value of this  
408 parameter is 5 per hour; (e) as a function of the frequency of touching tray table surfaces from 1  
409 to 8 per hour, where the baseline value of this parameter is 4 per hour.

410

## 411 **2.2 Supplementary properties of the surface contamination network**

412

413 The infection source can be a toilet if an infector vomits in it, as in the GI 747 outbreak, or a  
414 contaminated seat surface where the infector sat, as in the GII 737 outbreak. If the toilet (W2)  
415 was contaminated first, the subsequent contamination process of aisle seatback surfaces is as  
416 shown in [Figure S6](#). If the aisle seatback surface 14D was contaminated first, the surface  
417 contamination process is as shown in [Figure S7](#). The aisle seatback surface contamination  
418 network is a directed network, in which the direction is determined by the surface touching  
419 sequence of each individual. Viruses on the surfaces can only be transferred in this direction. The  
420 touched surfaces are categorised by touch generation. The first surface(s) touched or  
421 contaminated by an infected person is the origin generation. The first generation is a group of  
422 surfaces touched by any individual whose hands are contaminated by touching the origin  
423 generation surface(s). In general, the  $n$ th generation is a group of surfaces touched by any  
424 individual whose hands are contaminated by touching the contaminated ( $n-1$ )th generation  
425 surface(s). The concept of generation is as important as infection risk. In general, the most recent  
426 generation surfaces have a lower virus concentration. In [Figure S7](#), the aisle seatback surfaces in  
427 the first to the fifth are mainly located in the fourth and fifth generation of the surface  
428 contamination network, and we can qualitatively conclude that the aisle passengers sitting in the  
429 front of the cabin would have a lower exposure dose via the fomite route than others. The aisle  
430 passengers seated in the eleventh to twentieth rows would have a higher exposure dose via the  
431 fomite route than others because most of these rows are located in the first and second generation  
432 of the surface contamination network. This is consistent with the results from our computer  
433 simulation studies.

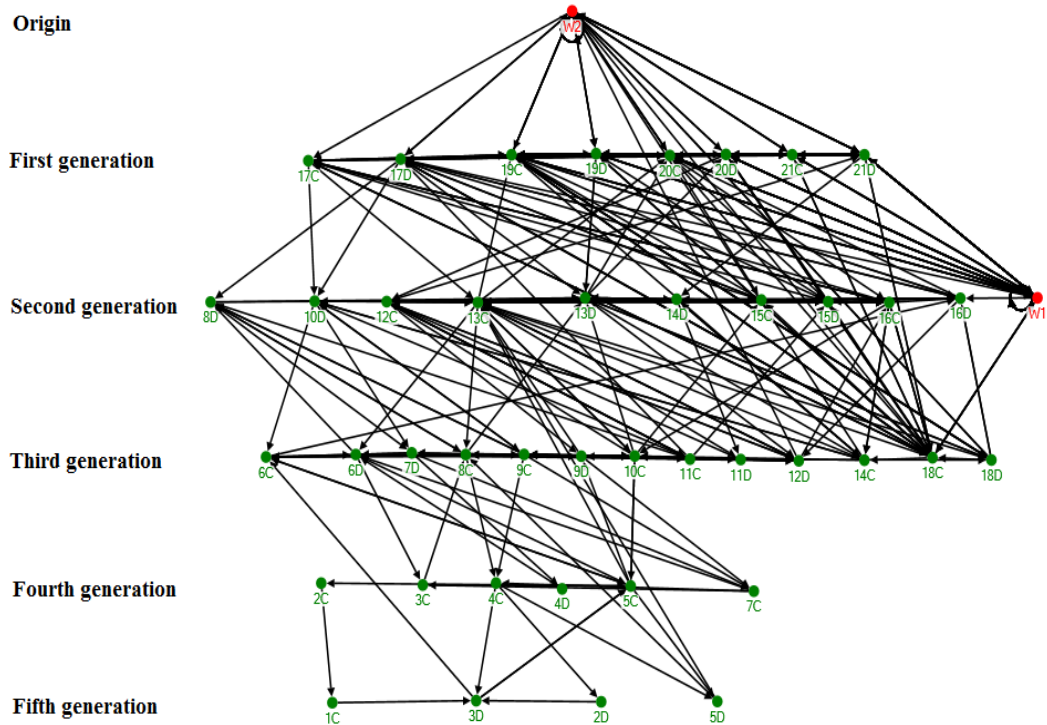

434  
435  
436  
437

**Figure S6.** Surface contamination of aisle seatback surfaces after one toilet (W2) becomes contaminated.

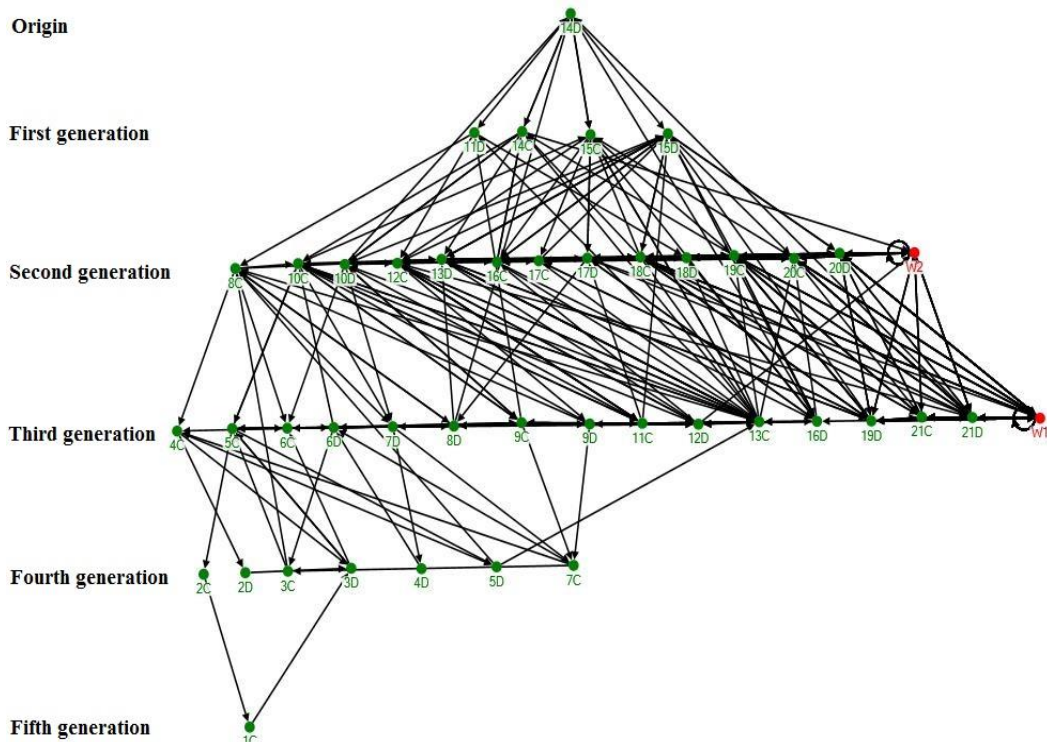

438  
439  
440

**Figure S7.** Surface contamination process after one seatback surface (14D) becomes contaminated.

441  
442  
443  
444  
445  
446  
447  
448  
449  
450  
451  
452  
453  
454  
455  
456  
457  
458  
459  
460  
461  
462  
463  
464  
465  
466

### 2.3 The effect of different critical values of surface contamination

It is reasonable to assume that when the amount of GII genomes on surfaces is less than a critical value (e.g., more than 1 genome/cm<sup>2</sup>), they cannot be transmitted to the contact hands. Therefore a critical number is suggested here for determining the minimum number of transmissible genomes on surfaces. The value of the critical number is most likely to be related to the surface material. For a rough surface such as fabric, this critical number may be high, whereas for a smooth surface such as glass, it can be much smaller. In this study, we adopt different values of the critical number for testing. Two values are tested (10 and 100 genomes/cm<sup>2</sup>), and the resulting number of contaminated surfaces is compared in [Figures S8a,b](#) and [c,d](#). When the critical value is 10 genomes/cm<sup>2</sup>, 65% of aisle seatback surfaces (26 of 40) will be contaminated, but only 40 of a total of 418 surfaces (9.5%) will be contaminated. This indicates that the aisle seatback surfaces are more contaminated, and so the aisle seat passengers are more likely to be infected. When the critical value is 100 genomes/cm<sup>2</sup>, 9 aisle seatback surfaces and 11 total surfaces are contaminated, i.e., in addition to the 9 aisle seatback surfaces, 2 more surfaces are contaminated. It also indicates that aisle seat passengers are more likely to be infected via the fomite route. Whether the critical value is high (100 genomes/cm<sup>2</sup>) or low (0 genome/cm<sup>2</sup>), the R-square values are all larger than 0.97. [Table S6](#) summarises the R-square and chi-square values of the four fits. When the number of degrees of freedom is large ([Figures 3a,b](#) and [S8a,b](#)), the chi-square value is large; the chi-square values in fits e and f are small because the number of degrees of freedom is small in these two fittings. The R-square and chi-square values of the fits indicate that the growth of the number of contaminated aisle seatback surfaces and of all surfaces both show a logistic trend.

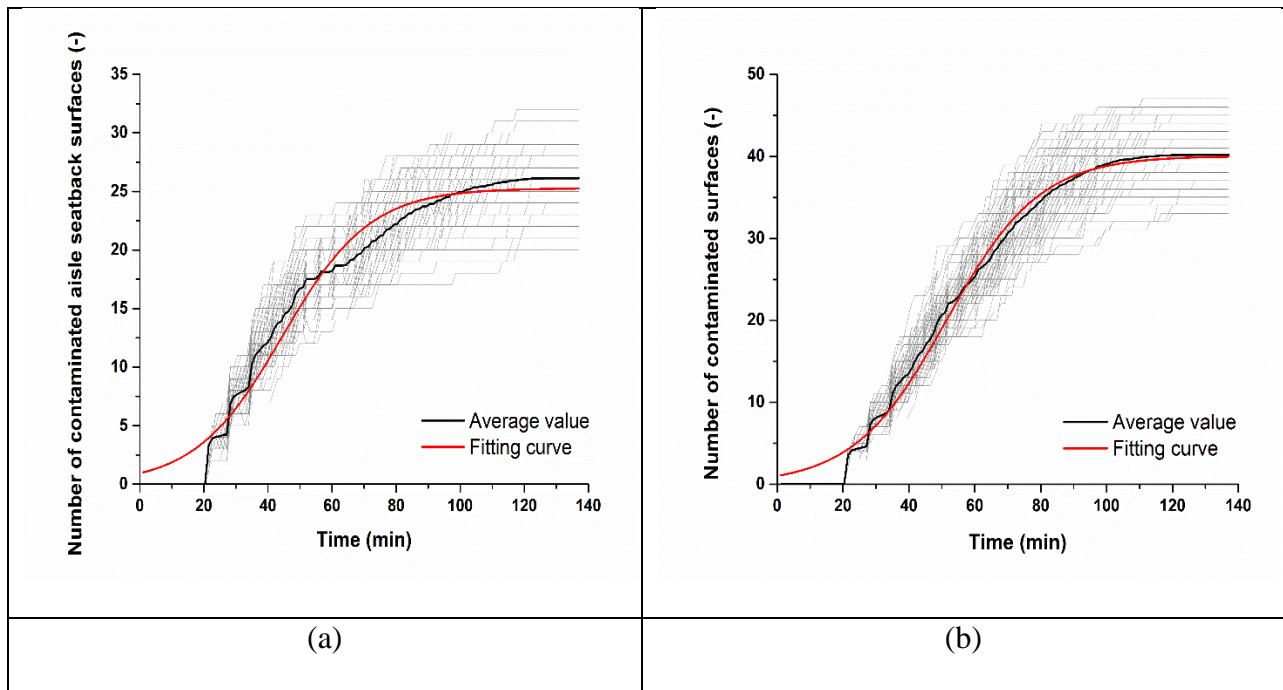

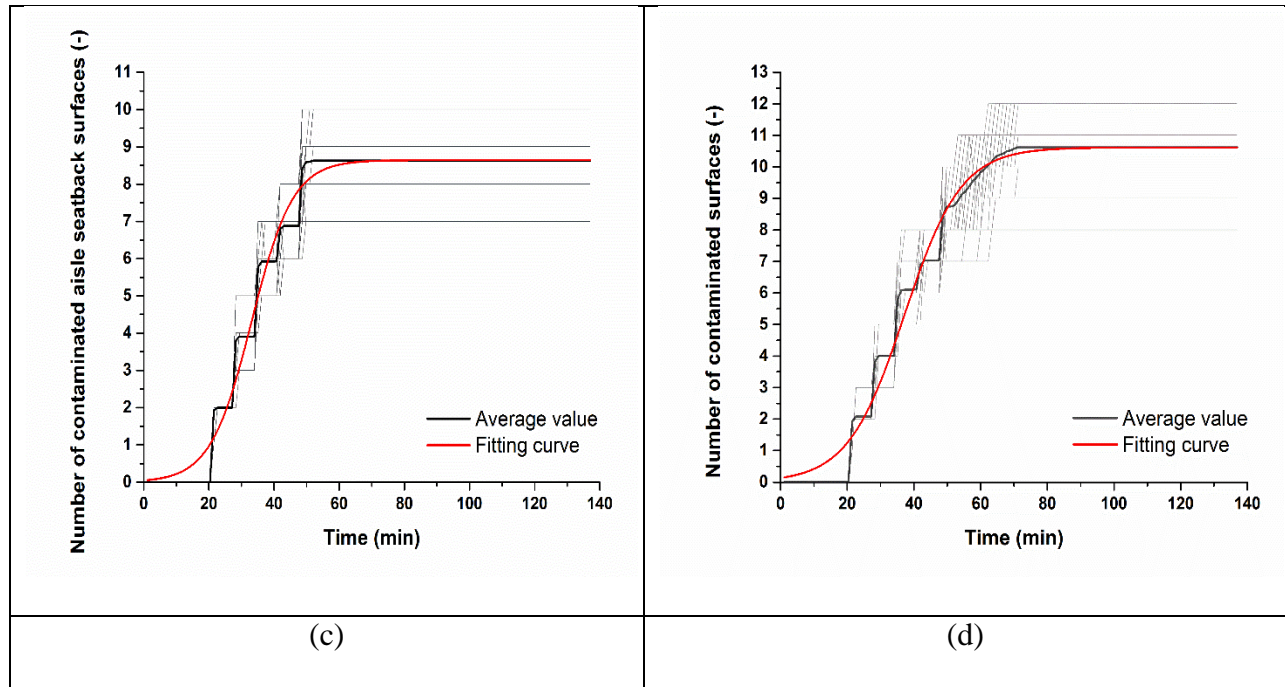

467  
 468 **Figure S8** Growth of the number of contaminated surfaces in the GII 737 outbreak, with  
 469 different critical thresholds of transmissible genomes: (a), (b) 10 genomes/cm<sup>2</sup>; (c), (d) 100  
 470 genomes/cm<sup>2</sup>. Each graph shows all 100 simulation results (grey), the average of these 100  
 471 simulation results (black) and the fitting curve of the average value using the logistic function  
 472 (red). The results for of 0 genomes/cm<sup>2</sup> are shown in [Figure 4](#) in the main text.

473  
 474 **Table S6** R-square and chi-square in the logistic regression.

| Fitting equation: $y = AB/(B + (A - B)e^{-cx})$ |       |          |
|-------------------------------------------------|-------|----------|
|                                                 | $R^2$ | $\chi^2$ |
| Figure 3a                                       | 0.971 | 5.52     |
| Figure 3b                                       | 0.994 | 70.83    |
| Figure 3c                                       | 0.997 | 3.00     |
| Figure 3d                                       | 0.998 | 131.72   |
| Figure S9a                                      | 0.979 | 1.86     |
| Figure S9b                                      | 0.993 | 1.51     |
| Figure S9c                                      | 0.990 | 0.11     |

|            |       |      |
|------------|-------|------|
| Figure S9d | 0.991 | 0.15 |
|------------|-------|------|

475  
476

## 477 **Limitations of methodologies**

478

479 This study has at least four limitations. First, although the airborne route plays a minor role, our  
480 simplifications in modeling the airborne route prediction need to be noted. The airborne droplet  
481 nuclei distribution in Economy class needs to be improved based on the understanding of the  
482 cabin airflow pattern. The focus of this study is on the surface contamination network related to  
483 the fomite route. Second, in the fomite route model, virus transfer by touch is always assumed to  
484 be from a high concentration surface to a low concentration surface. In practice, the transfer  
485 direction is most likely to be affected by the surface roughness and humidity. This may be  
486 addressed in future by developing an improved model of particle transfer between surfaces.  
487 Thirdly, due to a lack of data on the surface touching behaviour of passengers and crew members,  
488 the passenger behaviour patterns are assumed to be uniform. For example, all susceptible  
489 individuals are assumed to have the same toilet usage frequency. Further studies may be carried  
490 out in the aircraft cabin simulators or in real flights to acquire more information about human  
491 touching behaviours. Finally, also due to the lack of data, the initial norovirus concentration on  
492 all environmental surfaces was assumed to be 0 in both the computer simulations and the bench-  
493 top experiments, and the inactivation rate of norovirus in air was represented by that of the  
494 influenza virus.

## 495 **REFERENCES**

- 496 1. Kirking, H. L. *et al.* Likely transmission of norovirus on an airplane, October 2008. *Clin.*  
497 *Infect. Dis.* **50**, 1216-1221 (2010).
- 498 2. Holmes, J. D. & Simmons, G. C. Gastrointestinal illness associated with a long-haul flight.  
499 *Epidemiol. Infect.* **137**, 441-447 (2009).
- 500 3. Bean, B. *et al.* Survival of influenza viruses on environmental surfaces. *J. Infect. Dis.* **146**,  
501 47-51 (1982).
- 502 4. Sattar, S. A. *et al.* Hygienic hand antiseptics: should they not have activity and label claims  
503 against viruses? *Am. J. Infect. Control* **30**, 355-372 (2002).
- 504 5. King, M. F. *et al.* Modeling environmental contamination in hospital single-and four-bed  
505 rooms. *Indoor Air*, **25**: 694-707 (2015).
- 506 6. Liu, P. B. *et al.* Persistence of human noroviruses on food preparation surfaces and human  
507 hands. *Food Environ. Virol.* **1**, 141-147 (2009).
- 508 7. Cannon, J. L. *et al.* Surrogates for the study of norovirus stability and inactivation in the  
509 environment: A comparison of murine *Norovirus* and feline *Calicivirus*. *J. Food Prot.* **69**,  
510 2761-2765 (2006).
- 511 8. Sattar, S. A. *et al.* Transfer of bacteria from fabrics to hands and other fabrics: Development  
512 and application of a quantitative method using *Staphylococcus aureus* as a model. *J. Appl.*  
513 *Microbiol.* **90**, 962-970 (2001).
- 514 9. Mackintosh, C. A & Hoffman, P. N. An extended model for transfer of micro-organisms via the  
515 hands: differences between organisms and the effect of alcohol disinfection. *J Hyg (Lond).* **92**, 345-  
516 355 (1984).
- 517 10. Lopez, G. U, *et al.* Transfer efficiency of bacteria and viruses from porous and nonporous fomites to  
518 fingers under different relative humidity conditions. *Appl. Environ. Microbiol.* **79**, 5728-5734 (2013).

- 519 11. Rusin, P., Maxwell, S. & Gerba, C. Comparative surface-to-hand and fingertip-to-mouth  
520 transfer efficiency of gram-positive bacteria, gram-negative bacteria, and phage. *J. Appl.*  
521 *Microbiol.* **93**, 585-592 (2002).
- 522 12. Nicas, M. & Sun, G. An integrated model of infection risk in a health-care environment. *Risk*  
523 *Anal.* **26**, 1085-1096 (2006).
- 524 13. Hendley, J. O., Wenzel, R. P. & Gwaltney, J. M. Transmission of rhinovirus colds by self-  
525 inoculation. *N. Engl. J. Med.* **288**, 1361-1364 (1973).
- 526 14. Chan, M. C. *et al.* Fecal viral load and norovirus-associated gastroenteritis. *Emerg. Infect.*  
527 *Dis.* **12**, 1278-1280 (2006).
- 528 15. Glass, R. I., Parashar, U. D. & Estes, M. K. *Norovirus* gastroenteritis. *N. Engl. J. Med.* **361**,  
529 1776-1785 (2009).
- 530 16. Nazaroff, W. W. *Norovirus*, gastroenteritis, and indoor environmental quality. *Indoor Air* **21**,  
531 353-356 (2011).
- 532 17. Bonifait, L. *et al.* Detection and quantification of airborne norovirus during outbreaks in  
533 healthcare facilities. *Clin. Infect. Dis.* **61**, 299-304 (2015).
- 534 18. Marks, P. J. *et al.* Evidence for airborne transmission of Norwalk-like virus (NLV) in a hotel  
535 restaurant. *Epidemiol. Infect.* **124**, 481-487 (2000).
- 536 19. Cheesbrough, J. H. *et al.* Widespread environmental contamination with Norwalk-like  
537 viruses (NLV) detected in a prolonged hotel outbreak of gastroenteritis. *Epidemiol. Infect.*  
538 **125**, 93-98 (2000).
- 539 20. Wu, H. M. *et al.* A norovirus outbreak at a long-term-care facility: The role of environmental  
540 surface contamination. *Infect. Control Hosp. Epidemiol.* **26**, 802-810 (2005).
- 541 21. Nicas, M. & Jones, R. M. Relative contributions of four exposure pathways to influenza  
542 infection risk. *Risk Anal.* **29**, 1292-1303 (2009).
- 543 22. Barker, J., Vipond, I. B. & Bloomfield, S. F. Effects of cleaning and disinfection in reducing  
544 the spread of *Norovirus* contamination via environmental surfaces. *J. Hosp. Infect.* **58**, 42-49  
545 (2004).
- 546 23. Chen, S. C., Chang, C. F. & Liao, C. M. Predictive models of control strategies involved in  
547 containing indoor airborne infections. *Indoor Air* **16**, 469-481 (2006).
- 548 24. International Commission Radiological Protection. Human respiratory tract model for  
549 radiological protection. *Ann. ICRP* **24**, 1-482 (1994).
- 550 25. Nielsen, P. V. *et al.* Contaminant flow in the microenvironment between people under  
551 different ventilation conditions. *ASHRAE Trans.* **114**, 632-640 (2008).
- 552 26. Cox, C. S. Aerosol survival of *Pasteurella tularensis* disseminated from the wet and dry  
553 states. *Appl. Microbiol.* **21**, 482-486 (1971).
- 554 27. Ehresmann, D. W. & Hatch, M. T. Effect of relative humidity on the survival of airborne  
555 unicellular algae. *Appl. Microbiol.* **29**, 352-357 (1975).
- 556 28. Riley, R. L. & O'Grady, F. Airborne infection: transmission and control. (The Macmillan  
557 Company, 1961).
- 558 29. Xie, X. *et al.* Bacterial survival in evaporating deposited droplets on a Teflon-coated surface.  
559 *Appl. Microbiol. Biotechnol.* **73**, 703-712 (2006).
- 560 30. Xie, X. *et al.* How far droplets can move in indoor environments: revisiting the Wells  
561 evaporation-falling curve. *Indoor Air* **17**, 211-225 (2007).
- 562 31. Jones, R. M. *et al.* Characterizing the risk of infection from *Mycobacterium tuberculosis* in  
563 commercial passenger aircraft using quantitative microbial risk assessment. *Risk Anal.* **29**,  
564 355-365 (2009).

- 565 32. Harper, G. J. Airborne micro-organisms: survival tests with four viruses. *J. Hyg. (Lond)* **59**:  
566 479-486 (1961).
- 567 33. Thatcher, T. L. *et al.* Effects of room furnishings and air speed on particle deposition rates  
568 indoors. *Atmos. Environ.* **36**, 1811-1819 (2002).
- 569 34. Atkinson, M. P. & Wein, L. M. Quantifying the routes of transmission for pandemic  
570 influenza. *Bull. Math. Biol.* **70**, 820-867 (2008).
- 571 35. Thebault, A. *et al.* Infectivity of GI and GII noroviruses established from oyster related  
572 outbreaks. *Epidemics* **5**, 98-110 (2013).
- 573
